# Supplementary material for: The curious case of the tumour virus: 50 years of Burkitt's lymphoma
Source: Springer Nature journal article supplement (doi:10.1038/nrmicro2015), 2008-11-14
Supplement: 41579_2008_BFnrmicro2015_MOESM1_ESM.pdf [file 41579_2008_BFnrmicro2015_MOESM1_ESM.pdf]

**S1 | EBV latent transcription programs, latent genes and their functions.**

*EBV latency programs, the cells in which they are expressed and their protein/RNA expression profile*

| Transcription Program       | Cell Type where Found                            | Latent Genes Expressed                                                                    |
|-----------------------------|--------------------------------------------------|-------------------------------------------------------------------------------------------|
| Growth (Latency 3)          | Newly infected B cells<br>Immunoblastic lymphoma | EBNA1Cp/Wp, EBNA2, EBNA3A, EBNA3B, EBNA3C, EBNALP, LMP1, LMP2A, LMP2B, EBER1, EBER2, BART |
| Default (Latency 2)         | Germinal center B cells<br>Hodgkin's disease     | EBNA1Qp, LMP1, LMP2A, LMP2B, EBER1, EBER2, BART                                           |
| EBNA1 only (Latency 1)      | Dividing memory cells<br>Burkitt's lymphoma      | EBNA1Qp EBER1(?), EBER2(?), BART(?)                                                       |
| Latency Program (Latency 0) | Resting memory cells                             | EBER1, EBER2, BART(?)                                                                     |

*EBV Latency Genes and their functions*

EBNA1 – required for tethering of the viral genome to ensure replication and segregation of the viral DNA. Transactivates the latency control region (LCR) which encompasses Cp and Wp.

EBNA2 – transcription factor necessary for activating the promoters (Cp, Wp, LMP1p and LMP2p) involved in driving gene expression in the growth program. Functional homologue of Notch1C. Down regulates bcl-6, up regulates c-myc expression.

EBNA3A+3C – believed, but not proven, to be involved in transition from growth to default transcription program. Negative regulators of EBNA2. Facilitate epigenetic down regulation of Cp, Wp and bim.

EBNA3B – probably also involved in the negative regulation of Cp.

EBNALP – cooperates in EBNA2-mediated transactivation.

LMP1 – provides constitutive T helper cell signal which together with LMP2A helps rescue infected GC cells and drives them into the memory compartment.  
Down regulates bcl-6. Induces AID.

LMP2A - provides tonic BCR signal which together with LMP1 rescues infected GC cells. Induces AID.

EBER 1 and 2 – small RNAs believed, but not proven, to be expressed in all cells latently infected with EBV.

BARTs – collection of RNAs that get processed into microRNAs also believed, but not proven, to be expressed in all cells latently infected with EBV.
